# Supplementary material
Source: Springer Nature journal article supplement (https://www.springermedizin.de/resource/supplementary/12936_2013_2745_MOESM4_ESM.pdf/9544176)
Supplement: MOESM4 [file 9544176]

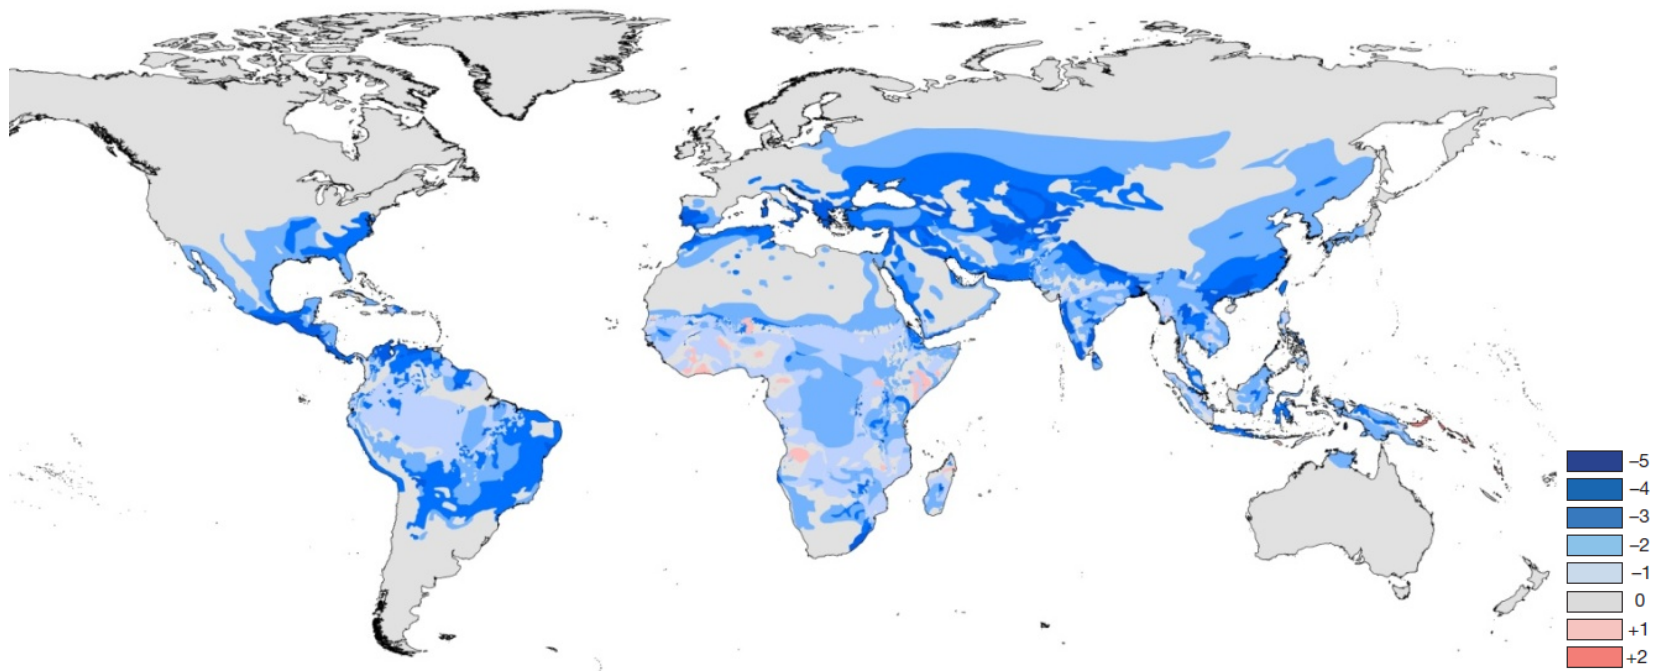

*Change in malaria endemicity class between 1900 and 2007. Negative values denote a reduction in endemicity, positive values an increase.*
